# Modeling the transmission of antibiotic-resistant Enterobacterales in the community: a systematic review

Eve Rahbé (1,2), Philippe Glaser\* (3), Lulla Opatowski\* (1,2)

1. *Institut Pasteur, Epidemiology and Modelling of Antimicrobials Evasion research unit, Paris, France*
2. *Université Paris-Saclay, UVSQ, Inserm, CESP, Anti-infective evasion and pharmacoepidemiology research team, Montigny-Le-Bretonneux, France*
3. *Institut Pasteur, Ecology and Evolution of Antibiotic Resistance research unit, Université Paris Cité, Paris, France*

\* Contributed equally to this work.

14 **Abstract**

15 **Background**

16 Infections by antibiotic-resistant Enterobacterales are a public health threat worldwide. While  
17 dissemination of these opportunistic pathogens has been largely studied in hospitals, less is known about  
18 their acquisition and spread in the community. Here, we aim to characterize mechanistic hypotheses and  
19 scientific contributions of mathematical modeling studies focusing on antibiotic-resistant Enterobacterales  
20 in the community.

21 **Methods**

22 We conducted a systematic review of mathematical modeling studies indexed in PubMed and focusing on  
23 the transmission of antibiotic-resistant Enterobacterales in the community (i.e., excluding models only  
24 specific to hospitals). For each study, we extracted model features (host population, setting), formalism  
25 (compartmental, individual-based), biological hypotheses (transmission, infection, antibiotic use impact,  
26 resistant strain specificities) and main findings. We discussed additional mechanisms to be considered,  
27 open scientific questions, and most pressing data needs to further improve upon existing epidemiological  
28 modeling.

29 **Results**

30 We identified 18 modeling studies focusing on the human transmission of antibiotic-resistant  
31 Enterobacterales in the community (n=11) or in both community and hospital (n=7). Models aimed at: (i)  
32 understanding mechanisms driving resistance dynamics; (ii) identifying and quantifying transmission  
33 routes; or (iii) evaluating public health interventions to reduce resistance. Studies highlighted that  
34 community transmission, compared to hospital transmission, play a significant role in the overall  
35 acquisition of antibiotic-resistant *Escherichia coli*. Predictions across models regarding the success of  
36 public health interventions to reduce resistance rates depended on pathogens, settings, and antibiotic  
37 resistance mechanisms. For *E. coli*, lowered person-to-person transmission led to greater reduction in  
38 antibiotic resistance rates compared to lowered antibiotic use in the community (n=2). For *Klebsiella*  
39 *pneumoniae* lowered antibiotic use in the hospital led to greater reduction compared to lowered use in the  
40 community (n=2). Finally, we reported a moderate number of modeling studies inferring parameters from  
41 empirical data (n=9), probably due to a critical lack of available data for antibiotic resistance rates in the  
42 community.

43 **Conclusions**

44 We found a limited number of modeling studies addressing the transmission of antibiotic-resistant  
45 Enterobacterales in the community, highlighting a need for model development and extensive community-  
46 based data collection. Such modeling will be critical to better understand the spread of antibiotic-resistant  
47 Enterobacterales in the community and design public health interventions specific to this setting.

48 **Keywords**

49 mathematical models; epidemiology; community transmission; *E. coli*; *K. pneumoniae*; antibiotic

50 resistance; carriage; public health

## 51 Introduction

52  
53 Antibiotic resistance in clinically relevant bacteria is a major threat for global health.<sup>1</sup> Yet its  
54 control, both at local and global scales, remains a challenge. Antibiotic resistance epidemiology is highly  
55 heterogeneous, as the emergence, selection and spread of resistance in human populations differs across  
56 pathogens, antibiotic resistance mechanisms and transmission settings. As a consequence, observed  
57 resistance rates vary greatly depending on the antibiotic and bacterial species under study.<sup>2</sup>

58 *Escherichia coli* and *Klebsiella pneumoniae*, two species of the order Enterobacterales, are  
59 estimated to be among the bacteria associated with the greatest burden of antibiotic resistance worldwide.<sup>3</sup>  
60 Enterobacterales are frequent opportunistic pathogens, predominantly carried asymptotically in the  
61 human gut but commonly responsible for extra-intestinal diseases, including potentially severe infections  
62 of the urinary tract, respiratory tract and bloodstream.<sup>4</sup> Since the 1980s, they have been increasingly  
63 associated with resistance to successive generations of extended-spectrum  $\beta$ -lactams, later followed by  
64 carbapenem resistance.<sup>5</sup> For *E. coli* alone, antibiotic resistance was associated with an estimated 829,000  
65 deaths in 2019 (95% confidence interval: 601,000-1,120,000).<sup>3</sup> For decades, antibiotic-resistant  
66 Enterobacterales infections were mostly reported as hospital-acquired, causing a large nosocomial  
67 burden.<sup>6</sup> At present, significant levels of extended spectrum  $\beta$ -lactamase (ESBL)-producing *E. coli*  
68 carriage are reported in healthy populations worldwide, with highest rates observed in South-East Asia.<sup>7,8</sup>  
69 In turn, a growing number of ESBL-producing *E. coli* infections are now reported as being community-  
70 acquired.<sup>9,10</sup>

71 Mathematical models of infectious disease transmission (“models”) are increasingly used in the  
72 field of antibiotic resistance epidemiology, to better characterize the emergence and transmission routes of  
73 antibiotic-resistant bacteria (ARB) in human populations, and to support public health decisions regarding  
74 ARB control.<sup>11</sup> As they rely on mechanistic hypotheses, models have generally focused on the  
75 transmission of specific antibiotic-bacteria combinations within specific environments. On one hand,  
76 “hospital” models formalize ARB selection and transmission within healthcare settings. Such models have  
77 been widely used to evaluate impacts of interventions such as antibiotic stewardship and patient isolation,  
78 and to assess transmission in different medical environments such as intensive care units and long-term  
79 care facilities.<sup>12</sup> The most studied ARB in hospital models are those historically at highest risk of  
80 nosocomial spread, including methicillin-resistant *Staphylococcus aureus* and to a lesser extent ESBL-  
81 producing Enterobacterales.<sup>13</sup> On the other hand, “community” models address ARB spread within human  
82 populations outside healthcare settings. Most published community models have focused on antibiotic-  
83 resistant *Streptococcus pneumoniae* or *Neisseria gonorrhoeae*.<sup>14</sup> While many Enterobacterales and other

84 clinically important bacteria also circulate extensively in the community, their transmission and control in  
85 this setting has been more rarely investigated.<sup>13,14</sup>

86 The biological and epidemiological mechanisms that drive antibiotic-resistant Enterobacterales  
87 selection and transmission in the community remain relatively poorly characterized and little quantified.  
88 <sup>15-17</sup> For instance, the contribution of horizontal gene transfer (HGT) within or between different  
89 reservoirs in driving the population-level epidemiology of antibiotic resistance is still poorly understood,<sup>18</sup>  
90 as is the role of asymptomatic carriage in driving transmission and infection<sup>19,20</sup> (note: we use the terms  
91 carriage and colonization interchangeably). It is also unclear how bacterial persistence in the environment  
92 contributes to maintain community transmission.<sup>15,21</sup> Mathematical modeling can help make sense of the  
93 scarce data available and disentangle the various mechanisms potentially contributing to observed  
94 dynamics.

95 Here, we systematically review published mathematical models of antibiotic-resistant  
96 Enterobacterales transmission in the community. We summarize models' characteristics and biological  
97 hypotheses and highlight their contributions and limitations. Finally, we discuss open scientific questions  
98 and the data sources needed to support the development of new models tailored to this growing global  
99 health problem.

## 100 **Methods**

101

### 102 **Database and search terms.**

103 We searched PubMed for published mathematical modeling studies describing the population-level  
104 human-to-human transmission of antibiotic-resistant Enterobacterales (*E. coli* and/or *K. pneumoniae*) in  
105 the community. The search included all studies presenting original results (excluding review articles)  
106 published in English between 1 January 1992 and 1 July 2023. We used the following search query:

107

108 ("transmission model\*[Title/Abstract] OR "dynamic model\*[Title/Abstract] OR "mechanistic  
109 model\*[Title/Abstract] OR "mathematical model\*[Title/Abstract] OR "compartment  
110 model\*[Title/Abstract] OR "compartmental model\*[Title/Abstract])

111 AND

112 ("commensal\*[All Fields] OR "escherichia coli"[All Fields] OR "coli"[All Fields] OR "e  
113 coli"[All Fields] OR "klebsiella pneumoniae"[All Fields] OR "klebsiella"[All Fields] OR "k  
114 pneumoniae"[All Fields] OR "enterobacterales"[All Fields] OR "enterobacteriaceae"[All Fields]  
115 OR "gram-negative"[All Fields])

116 AND

117 ("antibiotic resistance"[Title/Abstract] OR "antimicrobial resistance"[Title/Abstract] OR  
118 "multidrug resistance"[Title/Abstract] OR "beta lactam resistance"[Title/Abstract] OR  
119 "carbapenem resistance"[Title/Abstract] OR "antibiotic-resistant"[Title/Abstract] OR "multidrug-  
120 resistant"[Title/Abstract] OR "beta lactam-resistant"[Title/Abstract] OR "carbapenem-  
121 resistant"[Title/Abstract] OR "ESBL"[Title/Abstract])

122

123 We included modeling studies on commensal bacteria in addition to Enterobacterales, to also retrieve  
124 studies that focused on generic intestinal commensals. We did not explicitly add search terms such as  
125 “community” or “general population” in case these were too restrictive.

126

### 127 **Model selection: inclusion and exclusion criteria.**

128 Studies reporting a mathematical model formalizing the transmission of antibiotic-resistant  
129 Enterobacterales between human hosts in the community were eligible. We excluded studies which were  
130 in the following categories:

- 131 - *different methods*: studies not presenting a mechanistic transmission model, but rather statistical  
132 models, time-series analysis, or cost-effectiveness analysis;

- 133 - *different host population*: transmission models not focusing on humans, but rather on animals,  
134 livestock or pets;
- 135 - *different pathogens*: transmission models specifically designed for bacteria other than  
136 Enterobacterales, like *Helicobacter pylori* or *S. pneumoniae*;
- 137 - *different settings*: models only describing transmission in healthcare settings (hospitals, long-term  
138 care homes, nursing homes), without including the community;
- 139 - *different scales*: microscopic-level models (pharmaco-dynamic or pharmaco-kinetic models,  
140 microbial population models, within-host models, ...) not also including populational-level  
141 transmission.

142

### 143 **Data extracted and qualitative analysis.**

144 In a first step, we extracted key model features including: studied antibiotic-bacteria  
145 combinations, specificities of the host population (general population, high-risk groups), data sources used  
146 for estimation of antibiotic use parameter values (country, region, theoretical), and studied transmission  
147 settings (households, community, community and hospital). We summarized model hypotheses regarding  
148 bacterial transmission, the infection process, and effects of antibiotic exposure on carriage. The potential  
149 inclusion of any additional mechanisms was also summarized, such as potential resistance-associated  
150 fitness costs, multiple resistance acquisition routes and host population structure (**Table 1**). Finally,  
151 models were characterized according to the type of epidemiological antibiotic resistance data used (none,  
152 aggregated or individual-level) to perform parameter estimation (**Table 3**).

153 In a second step, we summarized each study's major findings. Reviewed articles were categorized  
154 according to their main scientific goals: (i) analyzing the impact of biological and/or populational  
155 mechanisms on antibiotic resistance dynamics; (ii) identifying routes of transmission and/or quantifying  
156 transmission; and (iii) evaluating the impact of public health interventions on antibiotic resistance trends.

157

158

159 **Results**

160  
161 Our search returned 192 publications, of which 18 met inclusion criteria and were included in the review  
162 (see PRISMA flowchart in [Figure 1](#)).<sup>22–39</sup>

163  
164 **Model features.**

165 The included modeling studies predominantly described *E. coli* transmission (9/18, [Table 1](#)). The  
166 others modeled transmission of generic commensal bacteria (3/18), generic Enterobacterales (3/18), *K.*  
167 *pneumoniae* (2/18) or generic Gram-negative bacteria (1/18). ESBL production was the most frequent  
168 type of antibiotic resistance mechanism modeled (10/18), while just one model focused on carbapenem  
169 resistance, in *K. pneumoniae* (1/18).<sup>24</sup> Host population was mainly representative of the general human  
170 population. Two studies specifically focused on high-risk groups, either returning travelers or returning  
171 hospitalized patients.<sup>25,37</sup> Concerning antibiotic use, ten studies explicitly used parameter values obtained  
172 from high income countries (France, Sweden, Switzerland, United Kingdom, United States, or European  
173 countries), two studies focused on low-resource villages in South America (Ecuador and Chile),<sup>31,39</sup> while  
174 two studies used theoretical parameters, and the remaining four did not specify antibiotic use parameters.  
175 While eleven models focused on community settings only, seven explicitly modeled both community and  
176 healthcare settings, considering setting-specific transmission parameters and antibiotic use rates.  
177 Compartmental modeling was the most frequent formalism used (n=15), while two models were  
178 individual-based, and one study included both a compartmental and individual-based model.

179  
180 **Biological hypotheses.**

181 *Between-human bacterial transmission.* The between-human transmission of antibiotic-resistant  
182 Enterobacterales was modeled in three different ways in the included studies ([Figure 2](#)): (i) models  
183 formalizing the transmission of resistant strains only (“R” models); (ii) models formalizing the  
184 transmission of sensitive or resistant strains (“R-S” models); and (iii) models focusing on the transmission  
185 of sensitive or resistant strains and allowing for single or multi-carriage of strains (“R-S-multi” models).  
186 Multi-carriage models have been proposed in the field of antibiotic resistance mathematical modeling to  
187 reproduce the observed coexistence of resistant and sensitive strains across different levels of antibiotic  
188 use, both at the individual- and population-level.<sup>40</sup>

189 *Bacterial infection.* While six models differentiated between asymptomatic carriage and  
190 symptomatic infection (“carriage & infection” model, [Figure 2](#)), most models (14/18, [Table 1](#)) did not  
191 (“infection-only” model, [Figure 2](#)). Although carriage is a precursor for many infections,<sup>41,42</sup> its exclusion



192 from most modelling studies likely stems from a lack of robust epidemiological data describing  
193 asymptomatic carriage of antibiotic-resistant Enterobacterales in healthy populations.

194 *Antibiotic selection for resistance.* Most models assumed that antibiotic exposure exerts selection  
195 pressure advantaging antibiotic-resistant bacteria (n=14). This was modelled according to three distinct  
196 mechanisms: (i) *S clearance*, the effective clearance of sensitive bacteria compared with no or less  
197 efficient clearance of resistant ones, giving the latter a relative transmission advantage; (ii) *R acquisition*,  
198 an increased probability of resistant bacteria acquisition in antibiotic exposed individuals, for instance due  
199 to loss of colonization resistance following microbiome dysbiosis; and (iii) *R emergence*, an increased  
200 probability of within-host populations of sensitive bacteria becoming resistant subsequent to antibiotic  
201 exposure, through antibiotics favoring the horizontal transfer of resistance genes from co-colonizing  
202 microbiota, or again through antibiotics killing sensitive microbiota, favoring the survival and outgrowth  
203 of resistant bacteria initially present within the host in undetectably small quantities, a phenomenon  
204 known as endogenous resistance acquisition (Figure 2C). Antibiotic use was formalized either explicitly,  
205 i.e. considering distinct compartments for treated and untreated individuals, or through multiplicative  
206 coefficients increasing rates at which sensitive strains are cleared or resistant strains are acquired.

## 207 208 **Main findings.**

209 The 18 reviewed modeling studies were classified according to their main scientific objectives (Table 1).

### 210 211 *Analyzing the impact of biological and/or populational mechanisms on antibiotic resistance dynamics*

212 Six modeling studies aimed to analyze how biological or populational mechanisms, such as  
213 within-host dynamics and host population structure, impact antibiotic-resistant Enterobacterales  
214 transmission dynamics (Table 1). Five out of these six studies used the “R-S” or “R-S-multi” model  
215 structures.

216 Several modeling studies formalized within-host mechanisms to investigate their impact on host-  
217 level antibiotic resistance dynamics. Austin et al. first explored how resistance-associated fitness costs in  
218 bacterial transmission could explain coexistence of sensitive and resistant strains of commensal bacteria in  
219 the intestinal microbiota, after individuals are given antibiotics following infection.<sup>36</sup> In this study, high  
220 fitness cost values were considered, assuming that resistant strains were 50% less transmissible than  
221 sensitive ones ( $c = 0.50$ , with parameter  $c$  defined in Figure 2A). Later, Davies et al. explicitly formalized  
222 the role of strain competition within the host, introducing multiple sub-compartments of resistant strain  
223 carriage and differential intra-host growth between resistant and sensitive strains.<sup>26</sup> Including such within-  
224 host competition mechanisms successfully reproduced rates of aminopenicillin and fluoroquinolone  
225 resistance estimated in *E. coli* across a large range of antibiotic use rates for European countries, and  
226 allowed for more flexible co-existence than the commonly used multi-carriage model (“R-S-multi” model

227 defined in [Figure 2A](#)).<sup>26</sup> Here, they estimated lower resistance-associated transmission costs ( $c < 0.20$  for  
228 both resistances in *E. coli*).<sup>26</sup> One model also formalized plasmid-mediated acquisition of ESBL  
229 production in *E. coli*.<sup>32</sup>

230 Other modeling studies evaluated whether structure in the host population could impact and  
231 explain antibiotic resistance dynamics at the population level (e.g., by considering that different host  
232 groups were characterized by distinct antibiotic use rates and inter-groups connectivity). They explored  
233 different structures, including geographic regions,<sup>29</sup> where spatial spillover led to weak observed antibiotic  
234 use-resistance associations in some regions, or host classes notably age.<sup>35</sup> Overall, considering highly  
235 structured populations allowed for the coexistence of sensitive and resistant bacteria over variable  
236 antibiotic use rates in these two studies.<sup>29,35</sup> Interestingly, another modeling study analyzing data from  
237 Ecuador showed that persistence of antibiotic resistant *E. coli* in communities inter-connected through  
238 travel could be explained either by high antibiotic consumption or high interconnectedness.<sup>31</sup>

239

#### 240 *Identifying and quantifying transmission routes*

241 We identified six studies using models to characterize routes of transmission and/or quantify  
242 transmission parameters for antibiotic-resistant Enterobacterales. All these studies used the “R” model  
243 structure, considering only transmission of resistant bacteria ([Table 1](#)).

244 Knight et al. and Allel et al. explored the relative contribution of community versus healthcare  
245 settings in the overall transmission of antibiotic resistance.<sup>38,39</sup> Their results both suggested that  
246 individuals from the general population mostly acquired resistant *E. coli* or other Gram-negative bacteria  
247 in the community, despite higher levels of antibiotic use and transmission in the hospital.<sup>38,39</sup> Within the  
248 community, multiple transmission routes were investigated in Mughini-Gras et al., such as human, food,  
249 environment, farm and companion animals.<sup>23</sup> Using a source-attribution model, they estimated that 60% of  
250 community carriage of ESBL-producing Enterobacterales originated from human-to-human transmission.  
251 Nevertheless, authors also estimated that, while they do not represent the main acquisition events,  
252 contribution from non-human sources is required to maintain observed levels of colonization in the  
253 community.<sup>23</sup>

254 In three studies, model fitting to individual antibiotic resistance carriage data provided parameter  
255 estimates for the transmission rate and carriage duration of ESBL-producing Enterobacterales.<sup>25,33,37</sup>  
256 Results were highly dependent on the population considered in the models and are summarized in [Table 2](#).  
257 Within households, probability of transmission from a colonized index case to other household members  
258 was estimated to be 12% from a returning traveler (95% confidence interval CI 5-18)<sup>37</sup> and 67% from a  
259 discharged hospital patient (95% CI 38-88).<sup>25</sup> In both studies, the estimated human-to-human transmission  
260 rate was in the order of  $10^{-3}$  events per day, whereas the estimated background environmental acquisition

261 rate was in the order of  $10^{-4}$  events per day (Table 2). Interestingly, longer median carriage duration was  
262 estimated for discharged patients (267 days, 95% CI 173-433) and household members (111 days, 95% CI  
263 56-217),<sup>25</sup> than for returning travelers (30 days, 95% CI 29-33), possibly explaining differences in the  
264 estimated transmission probabilities.<sup>37</sup> Within the general population, Van Den Bunt et al. estimated the  
265 human-to-human transmission rate to be  $9 \times 10^{-4}$  events per colonized individual per day (95% CI  $6 \times 10^{-4}$  -  
266  $10 \times 10^{-4}$ ).<sup>33</sup> In agreement with estimates from Haverkate et al.,<sup>25</sup> the median duration of carriage was  
267 estimated to be 128 days (95% CI 106-157).

268  
269 *Evaluating the impact of population-level interventions on antibiotic resistance dynamics in the*  
270 *community*

271 Six studies evaluated the effectiveness of public health interventions at reducing antibiotic  
272 resistance rates in Enterobacterales in the community (Table 1). Interventions included: antibiotic use  
273 reduction in the hospital, the community, or both;<sup>22,24,27,28,30</sup> antibiotic molecule replacement in the  
274 community;<sup>34</sup> and person-to-person transmission reduction in the hospital,<sup>24,27</sup> or in the community  
275 through hand hygiene.<sup>28,30</sup>

276 Among those, two modeling studies tested the theoretical impact of community-focused  
277 interventions. At both the household and population levels, modeling results suggested that hand hygiene  
278 was more effective than antibiotic use restriction to reduce ESBL-producing *E. coli* transmission.<sup>28,30</sup> In  
279 another study, using data from a 2-year intervention in a county in Sweden, Sundqvist et al. analyzed the  
280 impact of the substitution of trimethoprim with other antibiotics on resistance rates in *E. coli* urinary  
281 isolates.<sup>34</sup> They found a low reversibility of resistance, both from time-series analyses and a population-  
282 level mathematical model. They also estimated a relatively low fitness cost associated with trimethoprim  
283 resistance ( $c = 0.01-0.02$ , with parameter  $c$  defined in Figure 2A), likely contributing to this low  
284 reversibility.

285 Three models combining nosocomial and community transmission were used to compare the  
286 impact of interventions across these two settings.<sup>22,24,27</sup> MacFadden et al. fitted a transmission model to  
287 observed proportions of ESBL production among *E. coli* over time in Sweden.<sup>22</sup> They predicted that a  
288 20% decrease in antibiotic use in the community led to greater reductions in ESBL prevalence in both  
289 settings (community and hospital) than a same 20% decrease in hospital antibiotic use. Concerning *K*  
290 *pneumoniae*, two studies fitted their model to surveillance data of ESBL and carbapenem resistance rates  
291 over time in several European countries. In contrast to above estimates for *E. coli*, results from Kachalov  
292 et al. suggested that reducing nosocomial transmission and antibiotic consumption in hospitals had the  
293 strongest impact on *K. pneumoniae* resistance prevalence overall.<sup>24</sup> Salazar-Vizcaya et al. predicted that a  
294 50% decrease in consumption of all antibiotic classes in both hospitals and the community would lead to a

295 small but significant decline in the prevalence of resistant *K. pneumoniae* in upcoming years in both  
296 settings, whereas a 50% decrease in the in-hospital transmission rate would lead to a decline only in  
297 hospital.<sup>27</sup>

298

### 299 **Empirical data for statistical inference of parameters.**

300 Of the 18 reviewed studies, half inferred model parameters by fitting model simulations to  
301 antibiotic resistance data collected in human populations (Table 3). Among those, data either described  
302 individual-level carriage or aggregated region- or country-level cases of infection.

303 Antibiotic resistance carriage data were obtained from microbial analysis of fecal samples taken  
304 from individuals. Depending on the study, stool was sampled from healthy volunteers or from high-risk  
305 groups at regular intervals (days or months) to detect intestinal carriage of ESBL-producing  
306 Enterobacterales. The analysis of consecutive individual samples provides temporal information on the  
307 presence or absence of resistant bacteria, which can then be used to track bacterial acquisition or  
308 clearance. In three studies, longitudinal individual-level carriage data were accessed from cohort  
309 studies.<sup>25,33,37</sup> These models were formalized using the “R” structure, where the acquisition and  
310 transmission of only resistant bacteria is described (Table 1). This is probably due to a lack of information  
311 on non-resistant bacteria carriage in the available data.

312 The other main type of data considered was aggregated counts of infections sensitive or resistant  
313 to a particular antibiotic, by unit of time at the region or country level. These data predominantly came  
314 from national surveillance systems, such as in Sweden or Switzerland,<sup>22,27</sup> or at the European level.<sup>24,26</sup>  
315 One study used aggregated infection cases from an intervention study.<sup>34</sup> In these studies, the “R-S” or “R-  
316 S-multi” structures were usually chosen, considering the circulation of both resistant and non-resistant  
317 bacteria in the population. However, most of them considered only an infection stage, i.e. not considering  
318 carriage (Table 1).

319 The nine remaining studies did not estimate transmission parameters from data, relying instead on  
320 existing estimates from studies published in the literature. In one study, assumed parameters values were  
321 specific to Enterobacterales,<sup>38</sup> while, for two others, values estimated for *S. pneumoniae* were  
322 considered.<sup>29,35</sup> While these latter models were explicitly proposed to describe antibiotic resistance in  
323 generic commensal bacteria (as labeled “G” in Table 1), assumed resistance-associated fitness cost values  
324 were derived from *S. pneumoniae* and fixed to  $c = 0.168$ ,<sup>29</sup> or  $c = 0.04$ .<sup>35</sup>

## 325 Discussion

326

327 In this systematic review, we identified and analyzed 18 mathematical modeling studies published  
328 between 1992 and 2023 that describe the transmission of antibiotic-resistant Enterobacterales in the  
329 community. Overall, models varied substantially in their structure, assumptions and focus, but nonetheless  
330 provided consistent insights by (i) confirming the significant role of community transmission in the  
331 overall burden of antibiotic-resistant Enterobacterales, (ii) investigating how various candidate  
332 mechanisms explained observed epidemiological trends, (iii) providing species-specific estimates of key  
333 parameters related to unobserved processes such as transmission and clearance and (iv) projecting how the  
334 effectiveness of public health interventions depended on settings, bacterial species, and types of  
335 resistance. Despite important contributions in the last decade, we identified a lack of modeling studies  
336 specifically designed for antibiotic-resistant Enterobacterales in the community, likely linked to a paucity  
337 of standardized data in this setting.

338 While the spread of antibiotic resistance is frequently associated with hospitals, which are  
339 environments with high rates of antibiotic use and reservoirs of multidrug-resistant organisms, results  
340 from the reviewed modeling studies highlighted the significant role of the community in driving the  
341 overall spread of antibiotic-resistant Enterobacterales.<sup>22,38,39</sup> Epidemiological data also supported this  
342 hypothesis, showing that asymptomatic carriage of antibiotic-resistant Enterobacterales resulted mostly  
343 from frequent community-based acquisition events, at least for *E. coli*.<sup>43,44</sup> Consequently, the community  
344 and hospitals likely both play significant but distinct roles in the global emergence and dissemination of  
345 resistance in Enterobacterales. Modeling their transmission within and between these two settings is thus  
346 highly relevant, and several of the reviewed studies did so.<sup>22,24,27,28,32,38,39</sup> However, only two studies used  
347 detailed antibiotic resistant infection data specific to the two environments.<sup>22,27</sup> In the future, extensive  
348 antibiotic resistance data collection in the community, through general practitioners or outpatient  
349 microbiological laboratories, should enable setting-specific model parametrization and therefore help to  
350 better characterize the contribution of each setting to transmission.

351 Robust modelling of antibiotic-resistant Enterobacterales transmission in the community requires  
352 accounting for heterogeneity in risks of transmission or acquisition, and carriage duration. Modeling  
353 studies have quantified the high risks of transmission of antibiotic-resistant Enterobacterales from specific  
354 groups such as discharged hospital patients and colonized infants to healthy members of their  
355 households.<sup>25,30</sup> From epidemiological studies, it has been shown that travel to high-prevalence areas,  
356 including certain countries in Africa and Asia, was an important risk factor for resistant Enterobacterales  
357 acquisition.<sup>20,46</sup> However, despite this high acquisition risk, both model and epidemiological studies  
358 suggested that returning travelers might be associated with a low subsequent transmission risk in

359 households,<sup>37</sup> possibly due to a short carriage duration.<sup>37,47,48</sup> Future research should further investigate the  
360 traveler's role in spreading resistant Enterobacterales locally: while the rapid global spread of high-risk  
361 multidrug-resistant clones is clearly linked to travel,<sup>49</sup> it is unclear to what extent population movement  
362 contributes to community transmission dynamics once a clone has become established in a given region.  
363 Metapopulation models are powerful tools to account for impacts of such demographic and spatial  
364 heterogeneity on transmission, and could be harnessed to assess the net impact of public health  
365 interventions targeting specific sub-regions or sub-populations to reduce overall antibiotic resistance  
366 levels.<sup>50</sup> However, the development of such models incorporating multiple sub-populations and risk  
367 profiles requires access to fine-grained epidemiological data, including data on asymptomatic carriage,  
368 infection and antibiotic use stratified by age, location, and other relevant covariates.

369 Several of the reviewed studies were not species-specific but rather considered generic  
370 Enterobacterales or intestinal commensals,<sup>29,35,36,39</sup> with two of them using epidemiological parameters  
371 previously estimated for *S. pneumoniae*.<sup>29,35</sup> However, Enterobacterales and *S. pneumoniae* do not share  
372 the same ecological niche within the host (mainly gut vs upper respiratory tract) and differ in primary  
373 transmission routes (direct or indirect orofecal vs airborne transmission), antibiotic resistance mechanisms  
374 (e.g., efflux pumps removing antibiotics from the cell in some strains of macrolide-resistant *S.*  
375 *pneumoniae* versus the production of antibiotic-degrading enzymes among ESBL-producing  
376 Enterobacterales) or in the fraction of the human population that are carriers.<sup>51,52</sup> Such specificities suggest  
377 that commonly used pneumococcus models may have limited relevance for the study of  
378 Enterobacterales.<sup>53</sup> Importantly, even within Enterobacterales, strong heterogeneity exists between  
379 species: while most individuals carry *E. coli*, *K. pneumoniae* is carried in less than 50% of the general  
380 healthy population,<sup>54</sup> and non-*E. coli* Enterobacterales have been associated with greater transmissibility  
381 than *E. coli*.<sup>55,56</sup> In addition, most pneumococcus models estimated strong serotype-dependent fitness costs  
382 associated with resistance, resulting in reduced transmission capacity of resistant strains compared with  
383 sensitive ones.<sup>57,58</sup> While there is increasing evidence of resistance-associated fitness costs in  
384 Enterobacterales *in vitro*,<sup>59,60</sup> such estimates at the epidemiological level are rare. Such costs may be  
385 expected to vary not only across *E. coli*, *K. pneumoniae* and other Enterobacterales, but also depending on  
386 whether a specific resistance mechanism is mutation- or horizontally-acquired.<sup>61,62</sup> Improving our  
387 knowledge on such key parameters across bacterial species and resistance mechanisms, from *in vivo* and  
388 epidemiological studies, will be needed to develop more biologically relevant models. This will help to  
389 more consistently reproduce antibiotic resistance dynamics and better assess the expected impact of public  
390 health interventions on antibiotic resistance.<sup>34</sup>

391 As commensals, Enterobacterales thrive in the complex ecological environment that is the human gut.  
392 In this environment, myriad ecological phenomena occur, such as bacterial interactions, niche competition

393 and HGT. Such phenomena have been suggested to influence the acquisition, carriage, and pathogenesis  
394 of antibiotic-resistant Enterobacterales.<sup>63</sup> For example, dysbiosis following antibiotic use has been shown  
395 to reduce colonization resistance, the degree of protection conferred by the microbiome against the  
396 invasion of new and potentially antibiotic-resistant strains, or the overgrowth of pre-existing resistant  
397 strains.<sup>64</sup> Regardless of potential impacts of antibiotics, host heterogeneity in microbiota composition  
398 likely also modulates carriage risk and duration.<sup>65</sup> Further, HGT is known to contribute to the endogenous  
399 acquisition of resistance genes among resident bacteria, in part driving the observed prevalence of  
400 antibiotic-resistant Enterobacterales carriage.<sup>62</sup> Many of the models included in this review have used  
401 structures that implicitly assume some degree of within-host ecological interaction between  
402 Enterobacterales and other microbiota. However, explicit data-driven quantification of such interactions  
403 has been scarce, and a previous review has highlighted that impacts of microbiota and HGT have been,  
404 until now, only marginally included in population-level models of Enterobacterales epidemiology.<sup>66</sup>

405 To maintain sustained antibiotic-resistant Enterobacterales transmission in the community, reviewed  
406 models supported the hypothesis that non-human-source transmission events are relevant, including  
407 contact with animals or contaminated water, especially in low-income contexts.<sup>23 31,39</sup> However,  
408 approaches used to infer these transmission routes depended heavily on input data.<sup>67</sup> The appropriate  
409 design of community cohorts where humans, animals and the environment could be sampled in a  
410 controlled manner, collecting both genomic and epidemiological data, would help better infer the relative  
411 input of potential environmental transmission routes. Methodological developments will also be essential  
412 to better incorporate such genomic data within epidemiological transmission models.

413 This review also illustrated the importance of adapting model structure to the scientific question being  
414 asked and its specific context. Models aimed at quantifying transmission routes all used the “R” structure,  
415 while those aimed at assessing the impact of different mechanisms on antibiotic resistance dynamics  
416 frequently used the “R-S” and “R-S-multi” structures (Table 1). Such structural choices may have  
417 important consequences for model predictions. On one hand, the “R-S” structure, which assumes a  
418 resistance-associated fitness cost, predicts a key impact of antibiotic use on the invasion, maintenance, and  
419 transmission of competing sensitive and resistant strains in populations. However, accurate modelling of  
420 closely related strains requires knowledge about the degree to which these strains compete and co-colonize  
421 the same ecological niche. On the other hand, “R” structure models do not account for such ecological  
422 competition and thus fail to capture one of the driving forces of Enterobacterales epidemiology.<sup>26</sup>  
423 However, this simplified model structure may nonetheless be appropriate in certain contexts, for example  
424 when data on sensitive bacteria are unavailable and antibiotic selection for resistance can be incorporated  
425 parametrically.

426 Importantly, estimating key parameters to characterize antibiotic-resistant Enterobacterales  
427 transmission requires access to and analysis of appropriate data. In this review, 9 out of the 18 studies  
428 fitted their model to empirical collected data from human populations. When data were used, isolate  
429 metadata were often not detailed, impeding the identification of the sample's source (hospital or  
430 community) and type (carriage or infection). Yet such information is critical to correctly parametrize  
431 models. In many countries, hospital infection reporting is done routinely, providing extensive antibiotic  
432 susceptibility data on invasive isolates.<sup>68</sup> In contrast, infection and carriage surveillance in the community  
433 is more difficult to put in place, as antibiotic susceptibility testing is not done routinely.<sup>68</sup> This leads to  
434 scarce available data on Enterobacterales epidemiology in the community, especially for carriage. Future  
435 availability of robust carriage data in the community, through cohorts or cross-sectional studies, will be  
436 key to better inform models and further disentangle the role of asymptomatic colonization in resistance  
437 spread.

438 To conclude, our study provided a detailed summary of epidemiological insights provided by published  
439 modeling studies of antibiotic-resistant Enterobacterales transmission in the community setting. We  
440 highlighted that the available modeling literature is still scarce compared to the one focusing on other  
441 bacterial species or on hospital transmission.<sup>13,69</sup> The continued integration of hypothesis driven  
442 mechanisms and relevant epidemiological data into community-based transmission models will be  
443 necessary to better formalize the acquisition, colonization, and transmission of these bacteria within the  
444 general population. Open challenges in the field are, among others, to include with more precision the  
445 within-host processes in population-level models, to better integrate genomic and epidemiological data  
446 and to explore One Health transmission routes (Figure 3). Moreover, we advocate for extensive collection  
447 of antibiotic resistance carriage data in the community and the standardization of clinical bacterial isolate  
448 metadata. Such considerations will be instrumental in improving our understanding of the ecology and  
449 epidemiology of antibiotic-resistant Enterobacterales. In turn, this will be key to support the design of  
450 efficient public health interventions (hygiene measures, antibiotic prescribing reductions, wastewater  
451 treatment, vaccines, etc.), and identifying optimal target populations (high-risk individuals, households,  
452 communities, etc.) to reduce antibiotic resistance.



453 **Acknowledgments**

454 We thank David RM Smith for critical feedback on the manuscript.

455

456 **Funding**

457 ER's work was funded by an independent research Pfizer Global Medical Grant (number 57504809). LO  
458 and PG's work was funded by the French Government's "Investissement d'Avenir" program, Laboratoire  
459 d'Excellence "Integrative Biology of Emerging Infectious Diseases" (Grant ANR-10-LABX-62-IBEID).

460

461 **Availability of data and materials**

462 Not applicable.

463

464 **Authors' contribution**

465 ER, PG and LO designed the study. ER identified and analyzed the data. ER, PG and LO reviewed the  
466 data and wrote the manuscript. All authors read and approved the final manuscript.

467

468 **Declaration of interest**

469 None.

470

471 **Figures**  
472

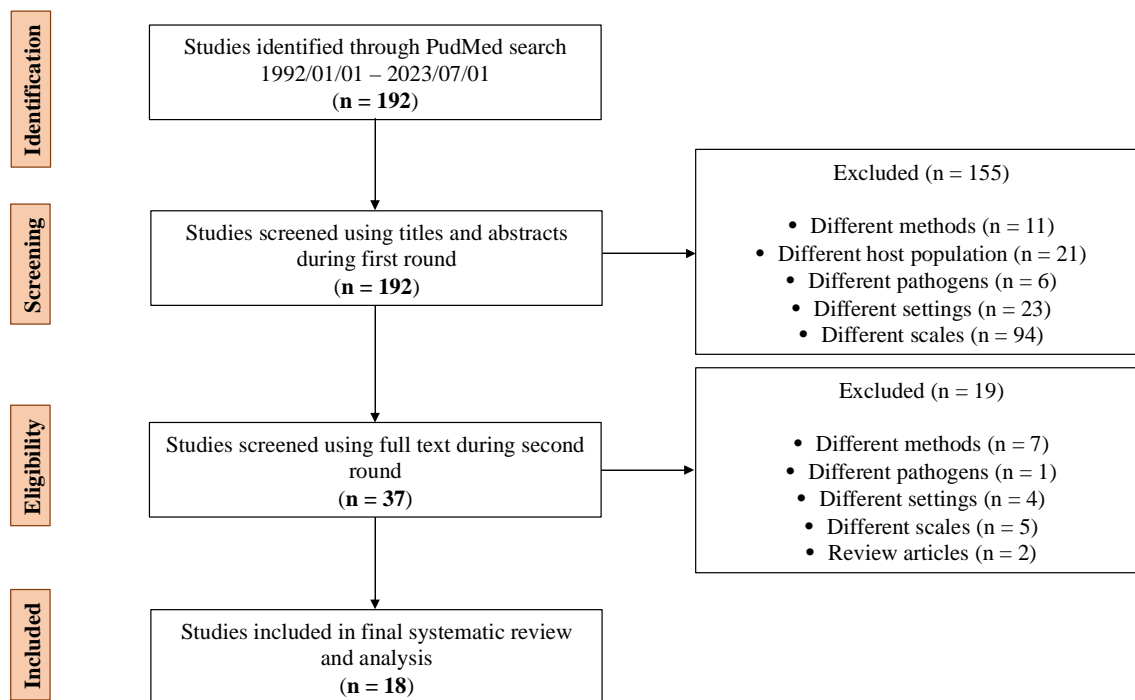

473  
474  
475 **Figure 1. PRISMA flowchart representing screening and selection of publications included in the**  
476 **reviewing process.**

477

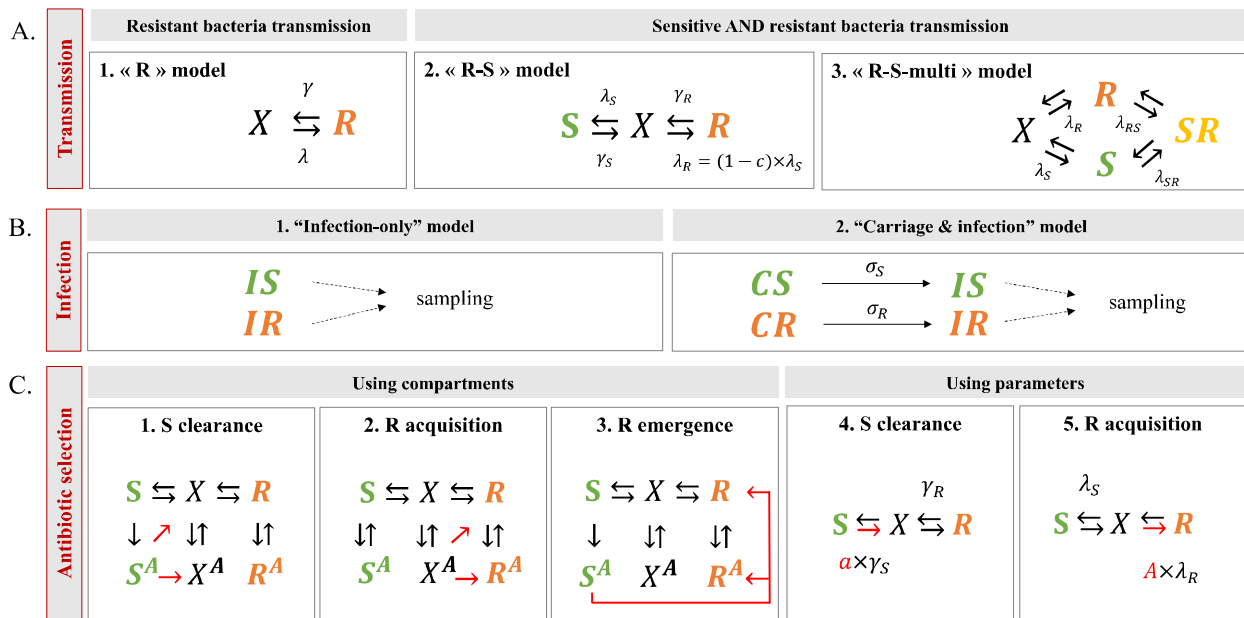

478  
479

**X**: uncolonized individuals

**S**: individuals colonized with sensitive bacteria

**R**: individuals colonized with resistant bacteria

**SR**: individuals co-colonized with sensitive and resistant bacteria

**IS**: individuals infected with sensitive bacteria

**IR**: individuals infected with resistant bacteria

**CS**: individuals colonized with sensitive bacteria

**CR**: individuals colonized with resistant bacteria

**S<sup>A</sup>, R<sup>A</sup>, X<sup>A</sup>**: individuals under antibiotic treatment

480  
481

482 **Figure 2. Hypotheses of mathematical models regarding between-human bacterial transmission,**  
483 **bacterial carriage and infection, and impacts of antibiotic use on the population-level dynamics of**  
484 **antibiotic resistant Enterobacteriales. (A) Transmission.** 3 mechanisms considered for between-human  
485 bacterial transmission: transmission of resistant strains only (1, “R”); transmission of both sensitive and  
486 resistant strains (2, “R-S”); and transmission of sensitive and resistant strains with both single and multi-  
487 carriage compartments (3, “R-S-multi”). **(B) Infection.** 2 mechanisms considered for bacterial carriage  
488 and infection: model only considering infection compartments (1, “infection-only”); and model accounting  
489 for both carriage and infection compartments, using a progression-to-disease rate between the two (2,  
490 “carriage & infection”) – in both cases, sampling is often performed on infections. **(C) Antibiotic**  
491 **selection for resistance.** 3 mechanisms considered for the selective impact of antibiotic use on resistance,  
492 using different models’ formalisms with either compartments (1,2,3) or parameters (1,2): *S clearance*. the  
493 clearance of sensitive bacteria compared to no clearance or slower clearance of resistant ones (1); *R*  
494 *acquisition*. the increased probability of resistant bacteria acquisition (2); and *R emergence*. within the  
495 host, populations of sensitive bacteria become resistant (3). The latter can be interpreted as representing  
496 the acquisition of antibiotic resistance genes from co-colonizing microbiota through horizontal gene  
497 transfer, and/or endogenous acquisition, i.e. the outgrowth of sub-dominant resistant bacteria present, prior  
498 to antibiotic exposure, in small quantities among individuals primarily carrying sensitive strains. It is  
499 important to note that the formalisms shown here are not exhaustive. **(A-B-C) Parameter description.**  $\lambda$ :  
500 force of colonization =  $\beta \times \frac{R}{S+R} + b$ ;  $\beta$ : between-human transmission rate in [/ day] or [/ carriers / day];  $b$ :  
501 constant background rate that captures transmission from non-human sources, horizontal transmission, or  
502 de novo emergence in [/ day];  $c$ : resistance-associated fitness cost;  $1/\gamma$ : duration of carriage ( $1/\gamma_S$  vs  
503  $1/\gamma_R$  if sensitive and resistant bacteria have different durations) in [day]);  $\sigma_S, \sigma_R$ : progression-to-disease  
504 rate in [/ carriers / day];  $a$ : multiplicative factor to increase clearance of sensitive bacteria, when  
505 individuals are under antibiotic use ( $a > 1$ );  $A$ : multiplicative factor to increase transmission of resistant  
506 bacteria, when individuals are under antibiotic use ( $A > 1$ ).

**Bacterial characteristics**

**Species-specific mechanisms ?**

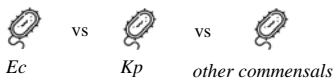

**Fitness cost ?**

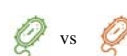

**Within-host mechanisms**

**Horizontal gene transfer ?**

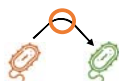

**Role of the microbiome ?**

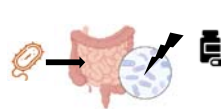

**S vs R ecological competition ?**

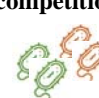

507  
508

**Selection**

**Transmission & Acquisition**

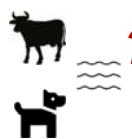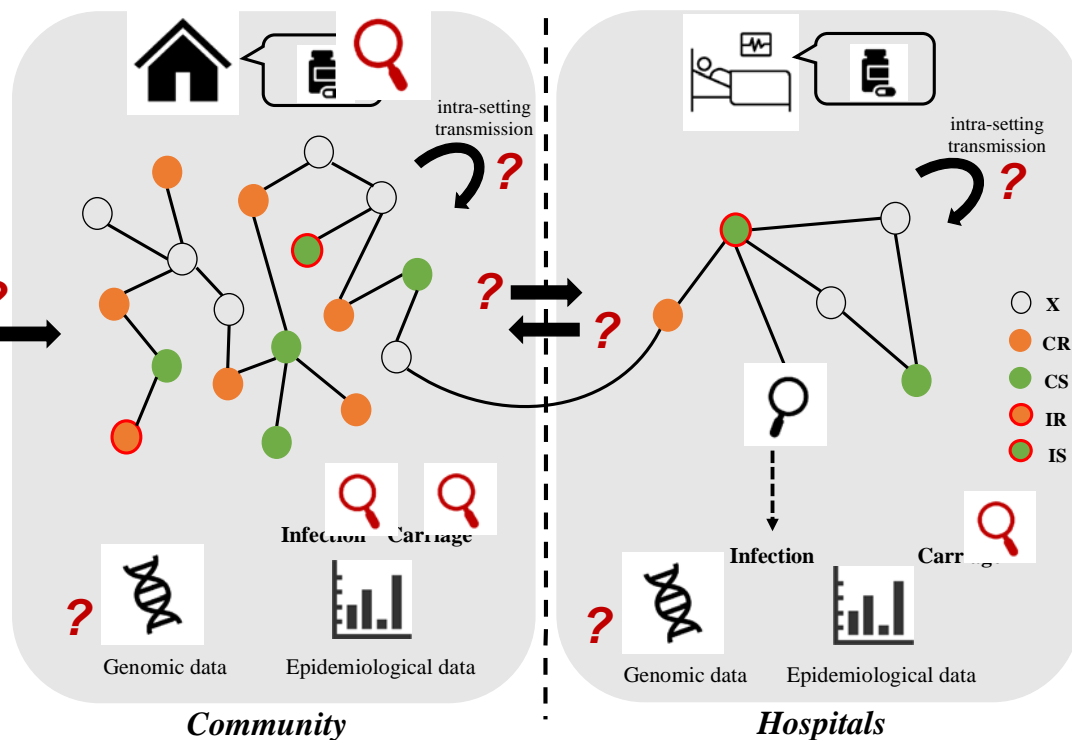

**Surveillance**

509  
510  
511

? Knowledge gaps

🔍 Missing data

512  
513

514 **Figure 3. Modeling antibiotic-resistant Enterobacterales transmission between humans in a**  
515 **comprehensive framework: knowledge gaps and missing data. *Bacterial characteristics.*** Biological  
516 and epidemiological characteristics of Enterobacterales differ from one another and from other important  
517 community-associated bacteria such as *S. pneumoniae*, *E. coli* and *K. pneumoniae*, for instance, are known  
518 to differ in terms of their transmissibility, carriage duration, and virulence properties. Different antibiotic-  
519 bacteria combinations also have specific resistance mechanisms and potential resistance-associated fitness  
520 costs. Model structure and parameterization should incorporate such biological knowledge and  
521 hypotheses. **Within-host mechanisms.** Most Enterobacterales are intestinal commensals, living in  
522 complex ecosystems. The role of the microbiota in colonization, infection and transmission should be  
523 further integrated into models, as well as the potential of horizontal gene transfer to accelerate the spread  
524 of resistance-conferring mobile genetic elements through bacterial and, in turn, human populations.  
525 **Selection.** Heterogeneous antibiotic use between populations (community vs hospitals; older vs younger  
526 individuals; different regions) might shape antibiotic resistance patterns in Enterobacterales, and more  
527 detailed data on specific consumption behaviors, especially in the community, are needed to better inform  
528 models. **Transmission & acquisition.** In addition to their roles as human intestinal symbionts,  
529 Enterobacterales circulate extensively among diverse vertebrate hosts and may persist for extended  
530 periods in environmental reservoirs. Models accounting for transmission from specific at-risk populations  
531 (e.g. discharged hospital patients) or non-human sources (e.g. pets, food) may help to elucidate  
532 transmission drivers in the community. **Surveillance.** High quality, standardized surveillance data from  
533 community settings are lacking, posing great challenges for accurate modeling. Specific transmission  
534 parameters should be informed by data specifically collected from resistant Enterobacterales, for both  
535 infection and carriage. Moreover, methodological development is needed to better incorporate genomic  
536 data into population-level epidemiological models. **Bacteria: Ec:** *Escherichia coli*; **Kp:** *Klebsiella*  
537 *pneumoniae*. **Compartments: X:** uncolonized individuals; **CS:** individuals colonized with sensitive  
538 strain; **CR:** individuals colonized with resistant strain; **IS:** individuals infected with sensitive strain; **IR:**  
539 individuals infected with resistant strain.

540

541 *Figure made with PowerPoint icons and Biorender images (license: Institut Pasteur).*

542

543 **Tables**

544

545

546

**Table 1. Summary of the 18 modeling studies included in the review.**

| Objectives                                            | Study                                           | Model features   |                              |                     |            | Model formalism                                                           | Biological hypotheses |            |                                                   | Additional mechanisms included                             |                             |                           | Data for inference (details in <a href="#">Table 3</a> ) |
|-------------------------------------------------------|-------------------------------------------------|------------------|------------------------------|---------------------|------------|---------------------------------------------------------------------------|-----------------------|------------|---------------------------------------------------|------------------------------------------------------------|-----------------------------|---------------------------|----------------------------------------------------------|
|                                                       |                                                 | Drug-bug pair *  | Type of hosts                | Antibiotic use data | Setting ** |                                                                           | Transmission          | I vs C *** | Antibiotic impact                                 | R strain specificities                                     | Bacterial acquisition       | Host population structure |                                                          |
| 1. Impact of mechanisms on dynamics                   | Austin et al. 1997 <sup>36</sup>                | G                | General population           | Theoretical         | C          | Deterministic compartmental                                               | R-S                   | -          | R emergence                                       | Reduced transmission                                       | Human-to-human + background | -                         | -                                                        |
|                                                       | Eisenberg et al. 2012 <sup>31</sup>             | APR-EC           | General population           | Village, Ecuador    | C          | Deterministic compartmental                                               | R                     | -          | R emergence                                       | -                                                          | Human-to-human + background | -                         | -                                                        |
|                                                       | Blanquart et al. 2018 <sup>35</sup>             | G                | General population           | Theoretical         | C          | Deterministic compartmental                                               | R-S                   | -          | Increased S clearance depending on susceptibility | Reduced transmission                                       | Human-to-human              | Yes                       | -                                                        |
|                                                       | Davies et al. 2019 <sup>26</sup>                | APR-EC<br>FQR-EC | General population           | European countries  | C          | Stochastic individual-based approximated by a deterministic compartmental | R-S-multi             | -          | Increased S clearance & R emergence               | Reduced transmission                                       | Human-to-human              | -                         | Aggregated                                               |
|                                                       | Olesen et al. 2020 <sup>29</sup>                | G                | General population           | European countries  | C          | Deterministic compartmental                                               | R-S-multi             | -          | Increased S clearance                             | Reduced transmission                                       | Human-to-human              | Yes                       | -                                                        |
|                                                       | Godijk et al. 2022 <sup>32</sup>                | ESBL-EC          | General population           | Netherlands         | C + H      | Deterministic compartmental                                               | R-S-multi             | Yes        | Increased S clearance & R emergence               | Different resistance-associated fitness costs and benefits | Human-to-human + background | -                         | -                                                        |
| 2. Transmission route identification & quantification | Arcilla et al. 2017 <sup>37</sup>               | ESBL-E           | High-risk group in household | -                   | C          | Stochastic individual-based                                               | R                     | -          | No effect                                         | -                                                          | Human-to-human + background | -                         | Individual                                               |
|                                                       | Haverkate et al. 2017 (x2 models) <sup>25</sup> | ESBL-E           | High-risk group in household | -                   | C          | Stochastic individual-based / Deterministic compartmental                 | R                     | -          | No effect                                         | -                                                          | Human-to-human + background | - / Yes                   | Individual                                               |
|                                                       | Knight et al. 2018 <sup>38</sup>                | ESBL-EC          | General population           | United Kingdom      | C + H      | Deterministic compartmental                                               | R                     | Yes        | Increased R acquisition                           | Reduced infection risk                                     | Human-to-human + background | -                         | -                                                        |
|                                                       | Mughini-Gras et al. 2019 <sup>23</sup>          | ESBL-EC          | General population           | -                   | C          | Deterministic compartmental                                               | R                     | -          | No effect                                         | -                                                          | Human-to-human + background | -                         | -                                                        |
|                                                       | Van den Bunt et al. 2020 <sup>33</sup>          | ESBL-E           | General population           | -                   | C          | Deterministic compartmental                                               | R                     | -          | No effect                                         | -                                                          | Human-to-human              | -                         | Individual                                               |
|                                                       | Allel et al. 2022 <sup>39</sup>                 | GN               | General population           | Village, Chile      | C + H      | Deterministic compartmental                                               | R                     | Yes        | Increased R acquisition                           | -                                                          | Human-to-human + background | -                         | Aggregated                                               |
| 3. Intervention evaluation                            | Sundqvist et al. 2010 <sup>34</sup>             | TrimR-EC         | General population           | Kronoberg, Sweden   | C          | Deterministic compartmental                                               | R-S                   | -          | Increased S clearance                             | Increased clearance                                        | Human-to-human              | -                         | Aggregated                                               |
|                                                       | Talaminos et al. 2016 <sup>28</sup>             | ESBL-EC          | General population           | Spain               | C + H      | Deterministic + stochastic compartmental                                  | R-S                   | Yes        | Increased R infection risk                        | -                                                          | Human-to-human              | -                         | -                                                        |
|                                                       | MacFadden et al. 2019 <sup>22</sup>             | ESBL-EC          | General population           | Sweden              | C + H      | Deterministic compartmental                                               | R-S                   | -          | Increased S clearance & R acquisition             | Reduced transmission                                       | Human-to-human              | -                         | Aggregated                                               |
|                                                       | Kardas-Sloma et al. 2020 <sup>30</sup>          | ESBL-EC          | General population           | France              | C          | Stochastic individual-based                                               | R                     | -          | Increased R acquisition                           | -                                                          | Human-to-human + background | -                         | -                                                        |
|                                                       | Kachalov et al., 2021 <sup>24</sup>             | 3GCR-KP<br>CR-KP | General population           | European countries  | C + H      | Deterministic compartmental                                               | R-S                   | Yes        | Increased S clearance & R emergence               | Reduced transmission                                       | Human-to-human + background | -                         | Aggregated                                               |
|                                                       | Salazar-Vizcaya et al. 2022 <sup>27</sup>       | ESBL-KP          | General population           | Switzerland         | C + H      | Deterministic compartmental                                               | R                     | Yes        | Increased R acquisition                           | -                                                          | Human-to-human + background | -                         | Aggregated                                               |

547 -: not included in the model

548

549

550

551

552

553

\* G: generic bacteria; GN: Gram-negative bacteria; EC: *E. coli*; KP: *K. pneumoniae*; ESBL: extended-spectrum beta-lactamase producing bacteria; TrimR: trimethoprim resistant; 3GCR: third-generation cephalosporin resistant; CR: carbapenem resistant; APR: aminopenicillins resistant; FQR: fluoroquinolone resistant \*\* C: community; H: hospital \*\*\* I vs C: infection versus carriage differentiation; S: sensitive bacteria; R: resistant bacteria

554 **Table 2. Transmission model parameter estimates for ESBL-producing Enterobacterales, obtained**  
 555 **from individual-based models informed by longitudinal antibiotic resistance carriage data.**

556

| <b>Study</b>                                    | <b>Host population</b>                 | <b>Human-to-human transmission rate</b><br>(95% confidence interval)                              | <b>Background environmental acquisition rate</b><br>(95% confidence interval) | <b>Median carriage duration</b><br>(95% confidence interval)                                    |
|-------------------------------------------------|----------------------------------------|---------------------------------------------------------------------------------------------------|-------------------------------------------------------------------------------|-------------------------------------------------------------------------------------------------|
| <b>Arcilla et al. 2017</b> <sup>37</sup>        | Returning travelers, within households | $1.3 \times 10^{-3}$ /colonized individual/day<br>( $0.5 \times 10^{-3}$ - $2.4 \times 10^{-3}$ ) | $7.3 \times 10^{-4}$ /day<br>( $5.4 \times 10^{-4}$ - $9 \times 10^{-4}$ )    | 30 days<br>(29-33) for returning travelers                                                      |
| <b>Haverkate et al. 2017 (x2)</b> <sup>25</sup> | Discharged patients, within household  | $5.3 \times 10^{-3}$ /colonized individual/day<br>( $2.5 \times 10^{-3}$ - $11 \times 10^{-3}$ )  | $1.5 \times 10^{-4}$ /day<br>( $0.2 \times 10^{-4}$ - $3.9 \times 10^{-4}$ )  | 267 days<br>(173 - 433) for discharged patients<br>111 days<br>(56 - 217) for household members |
| <b>Van den Bunt et al. 2020</b> <sup>33</sup>   | General population                     | $9 \times 10^{-4}$ /colonized individual/day<br>( $6 \times 10^{-4}$ - $10 \times 10^{-4}$ )      | -                                                                             | 128 days<br>(106 - 157) for healthy individuals                                                 |

557  
558



559  
560

**Table 3. Details on empirical data used for inference in the reviewed modeling studies.**

| Objective                                              | Study                                     | Empirical data used for inference                                                   |                                                                                          |                                   |                                                                                     |                                                                                                                                                                                                |
|--------------------------------------------------------|-------------------------------------------|-------------------------------------------------------------------------------------|------------------------------------------------------------------------------------------|-----------------------------------|-------------------------------------------------------------------------------------|------------------------------------------------------------------------------------------------------------------------------------------------------------------------------------------------|
|                                                        |                                           | Drug-bug pair                                                                       | Isolates sampling                                                                        | Collection scale                  | Resistance data type                                                                | Data source                                                                                                                                                                                    |
| 1. Impact of mechanisms on dynamics                    | Davies et al. 2019 <sup>26</sup>          | Aminopenicillin and fluoroquinolone resistances in <i>E. coli</i>                   | <b>Infection</b><br>Invasive isolates extracted from blood and cerebrospinal fluid       | <b>Country-level (aggregated)</b> | <b>One-year proportion data</b><br>2015                                             | <b>Surveillance data</b><br>30 countries; European Center for Disease Control - ECDC                                                                                                           |
| 2. Transmission routes identification & quantification | Arcilla et al. 2017 <sup>37</sup>         | ESBL-producing Enterobacteriaceae                                                   | <b>Carriage</b><br>Fecal samples                                                         | <b>Individual-level</b>           | <b>Longitudinal count data</b><br>12 months follow-up with 5 time points, 2012-2013 | <b>Cohort study</b><br>Multicenter, longitudinal, prospective cohort of travelers and non-traveling household members followed up before and after travel; Netherlands                         |
|                                                        | Haverkat e et al. 2017 (x2) <sup>25</sup> | ESBL-producing Enterobacteriaceae                                                   | <b>Carriage</b><br>Fecal samples                                                         | <b>Individual-level</b>           | <b>Longitudinal count data</b><br>18 months follow-up with 5 time points, 2010-2013 | <b>Cohort study</b><br>Multicenter, longitudinal, prospective cohort of hospitalized patients and non-hospitalized household members followed up during and after hospitalization; Netherlands |
|                                                        | Van den Bunt et al. 2020                  | ESBL-producing Enterobacteriaceae                                                   | <b>Carriage</b><br>Fecal samples                                                         | <b>Individual-level</b>           | <b>Longitudinal count data</b><br>6 months follow-up with 3 time points, 2014-2016  | <b>Cohort study</b><br>Longitudinal cohort of community individuals selected from a nationwide cross-sectional study; Netherlands                                                              |
|                                                        | Allel et al. 2022 <sup>39</sup>           | Fluoroquinolone, cephalosporin and carbapenem resistances in Gram-negative bacteria | <b>Carriage</b><br>Fecal samples                                                         | <b>Region-level (aggregated)</b>  | <b>Yearly incidence data</b><br>2018-2019                                           | <b>Cohort study</b><br>Longitudinal cohort study sampling households in Chile (MAUCO and MDRGN studies)                                                                                        |
| 3. Intervention evaluation                             | Sundqvist et al. 2010 <sup>34</sup>       | Multiple resistance in <i>E. coli</i>                                               | <b>Infection</b><br>Isolates extracted from urine                                        | <b>Region-level (aggregated)</b>  | <b>Monthly proportion data</b><br>1991-2008                                         | <b>Intervention study</b><br>Intervention for 24 months from 2004 to 2006; inclusion of all isolates tested by 2 hospitals; Kronoberg county, Sweden                                           |
|                                                        | MacFadden et al. 2019 <sup>22</sup>       | Third-generation cephalosporin resistance in <i>E. coli</i>                         | <b>Infection</b><br>Isolates from both outpatient (urine) and inpatient (blood) settings | <b>Country-level (aggregated)</b> | <b>Yearly proportion data</b><br>2001-2016                                          | <b>Surveillance data</b><br>Surveillance of antibiotic resistance from hospital and community settings; Sweden                                                                                 |
|                                                        | Kachalov et al., 2021 <sup>24</sup>       | Third-generation cephalosporin and carbapenem resistance in <i>K. pneumoniae</i>    | <b>Infection</b><br>Invasive isolates extracted from blood and cerebrospinal fluid       | <b>Country-level (aggregated)</b> | <b>Yearly proportion data</b><br>2005-2015                                          | <b>Surveillance data</b><br>11 countries; European Center for Disease Control - ECDC                                                                                                           |
|                                                        | Salazar-Vizcaya et al. 2022 <sup>27</sup> | ESBL-producing <i>K. pneumoniae</i>                                                 | <b>Infection</b><br>Invasive and non-invasive isolates                                   | <b>Region-level (aggregated)</b>  | <b>Yearly proportion data</b><br>2004-2017                                          | <b>Surveillance data</b><br>Routine and patient-specific collection of antibiotic resistance data; data from Valais; Swiss Centre for Antibiotic Resistance database - ANRESIS                 |

561

## 562 Bibliography

- 563
- 564 1 W H O. Global action plan on antimicrobial resistance. 2015.
- 565 <http://www.emro.who.int/health-topics/drug-resistance/global-action-plan.html> (accessed Sept
- 566 20, 2021).
- 567 2 Rahbe E, Watier L, Guillemot D, Glaser P, Opatowski L. Determinants of worldwide
- 568 antibiotic resistance dynamics across drug-bacterium pairs: a multivariable spatial-temporal
- 569 analysis using ATLAS. *Lancet Planet Health* 2023; **7**: e547–57.
- 570 3 Antimicrobial Resistance Collaborators. Global burden of bacterial antimicrobial resistance in
- 571 2019: a systematic analysis. *Lancet* 2022; **399**: 629–55.
- 572 4 Jenkins C, Rentenaar RJ, Landraud L, Brisse S. Enterobacteriaceae. In: *Infectious Diseases*.
- 573 Elsevier, 2017: 1565–1578.e2.
- 574 5 Schwaber MJ, Carmeli Y. Carbapenem-resistant Enterobacteriaceae: a potential threat. *JAMA*
- 575 2008; **300**: 2911–3.
- 576 6 Abban MK, Ayerakwa EA, Mosi L, Isawumi A. The burden of hospital acquired infections
- 577 and antimicrobial resistance. *Heliyon* 2023; **9**: e20561.
- 578 7 Bezabih YM, Sabiiti W, Alamneh E, *et al.* The global prevalence and trend of human
- 579 intestinal carriage of ESBL-producing *Escherichia coli* in the community. *J Antimicrob*
- 580 *Chemother* 2021; **76**: 22–9.
- 581 8 Woerther P-L, Burdet C, Chachaty E, Andremont A. Trends in human fecal carriage of
- 582 extended-spectrum  $\beta$ -lactamases in the community: toward the globalization of CTX-M. *Clin*
- 583 *Microbiol Rev* 2013; **26**: 744–58.
- 584 9 Bonten M, Johnson JR, van den Biggelaar AHJ, *et al.* Epidemiology of *Escherichia coli*
- 585 Bacteremia: A Systematic Literature Review. *Clin Infect Dis* 2021; **72**: 1211–9.
- 586 10 Pitout JDD, Nordmann P, Laupland KB, Poirel L. Emergence of Enterobacteriaceae
- 587 producing extended-spectrum beta-lactamases (ESBLs) in the community. *J Antimicrob*
- 588 *Chemother* 2005; **56**: 52–9.
- 589 11 Opatowski L, Guillemot D, Boëlle P-Y, Temime L. Contribution of mathematical modeling to
- 590 the fight against bacterial antibiotic resistance. *Curr Opin Infect Dis* 2011; **24**: 279–87.
- 591 12 Bonten MJ, Austin DJ, Lipsitch M. Understanding the spread of antibiotic resistant pathogens
- 592 in hospitals: mathematical models as tools for control. *Clin Infect Dis* 2001; **33**: 1739–46.
- 593 13 Niewiadomska AM, Jayabalasingham B, Seidman JC, *et al.* Population-level mathematical
- 594 modeling of antimicrobial resistance: a systematic review. *BMC Med* 2019; **17**: 81.
- 595 14 Ramsay DE, Invik J, Checkley SL, Gow SP, Osgood ND, Waldner CL. Application of
- 596 dynamic modelling techniques to the problem of antibacterial use and resistance: a scoping
- 597 review. *Epidemiol Infect* 2018; **146**: 2014–27.
- 598 15 Chatterjee A, Modarai M, Naylor NR, *et al.* Quantifying drivers of antibiotic resistance in
- 599 humans: a systematic review. *Lancet Infect Dis* 2018; **18**: e368–78.
- 600 16 Hilty M, Betsch BY, Bögli-Stuber K, *et al.* Transmission dynamics of extended-spectrum  $\beta$ -
- 601 lactamase-producing Enterobacteriaceae in the tertiary care hospital and the household setting.
- 602 *Clin Infect Dis* 2012; **55**: 967–75.
- 603 17 Rodríguez-Baño J, López-Cerero L, Navarro MD, Díaz de Alba P, Pascual A. Faecal carriage
- 604 of extended-spectrum beta-lactamase-producing *Escherichia coli*: prevalence, risk factors and
- 605 molecular epidemiology. *J Antimicrob Chemother* 2008; **62**: 1142–9.
- 606 18 Despotovic M, de Nies L, Busi SB, Wilmes P. Reservoirs of antimicrobial resistance in the
- 607 context of One Health. *Curr Opin Microbiol* 2023; **73**: 102291.
- 608 19 Ny S, Löfmark S, Börjesson S, *et al.* Community carriage of ESBL-producing *Escherichia*

- 609 coli is associated with strains of low pathogenicity: a Swedish nationwide study. *J Antimicrob*  
610 *Chemother* 2017; **72**: 582–8.
- 611 20 Raffelsberger N, Buczek DJ, Svendsen K, *et al.* Community carriage of ESBL-producing  
612 *Escherichia coli* and *Klebsiella pneumoniae*: a cross-sectional study of risk factors and  
613 comparative genomics of carriage and clinical isolates. *mSphere* 2023; : e0002523.
- 614 21 Godijk NG, Bootsma MCJ, Bonten MJM. Transmission routes of antibiotic resistant bacteria:  
615 a systematic review. *BMC Infect Dis* 2022; **22**: 482.
- 616 22 MacFadden DR, Fisman DN, Hanage WP, Lipsitch M. The Relative Impact of Community  
617 and Hospital Antibiotic Use on the Selection of Extended-spectrum Beta-lactamase-producing  
618 *Escherichia coli*. *Clin Infect Dis* 2019; **69**: 182–8.
- 619 23 Mughini-Gras L, Dorado-García A, van Duijkeren E, *et al.* Attributable sources of  
620 community-acquired carriage of *Escherichia coli* containing  $\beta$ -lactam antibiotic resistance  
621 genes: a population-based modelling study. *Lancet Planet Health* 2019; **3**: e357–69.
- 622 24 Kachalov VN, Nguyen H, Balakrishna S, *et al.* Identifying the drivers of multidrug-resistant  
623 *Klebsiella pneumoniae* at a European level. *PLoS Comput Biol* 2021; **17**: e1008446.
- 624 25 Haverkate MR, Platteel TN, Fluit AC, *et al.* Quantifying within-household transmission of  
625 extended-spectrum  $\beta$ -lactamase-producing bacteria. *Clin Microbiol Infect* 2017; **23**: 46.e1-  
626 46.e7.
- 627 26 Davies NG, Flasche S, Jit M, Atkins KE. Within-host dynamics shape antibiotic resistance in  
628 commensal bacteria. *Nat Ecol Evol* 2019; **3**: 440–9.
- 629 27 Salazar-Vizcaya L, Atkinson A, Kronenberg A, *et al.* The impact of public health  
630 interventions on the future prevalence of ESBL-producing *Klebsiella pneumoniae*: a  
631 population based mathematical modelling study. *BMC Infect Dis* 2022; **22**: 487.
- 632 28 Talaminos A, López-Cerero L, Calvillo J, Pascual A, Roa LM, Rodríguez-Baño J. Modelling  
633 the epidemiology of *Escherichia coli* ST131 and the impact of interventions on the community  
634 and healthcare centres. *Epidemiol Infect* 2016; **144**: 1974–82.
- 635 29 Olesen SW, Lipsitch M, Grad YH. The role of “spillover” in antibiotic resistance. *Proc Natl*  
636 *Acad Sci USA* 2020; **117**: 29063–8.
- 637 30 Kardaś-Słoma L, Yazdanpanah Y, Perozziello A, *et al.* Hand hygiene improvement or  
638 antibiotic restriction to control the household transmission of extended-spectrum  $\beta$ -lactamase-  
639 producing *Escherichia coli*: a mathematical modelling study. *Antimicrob Resist Infect Control*  
640 2020; **9**: 139.
- 641 31 Eisenberg JNS, Goldstick J, Cevallos W, *et al.* In-roads to the spread of antibiotic resistance:  
642 regional patterns of microbial transmission in northern coastal Ecuador. *J R Soc Interface*  
643 2012; **9**: 1029–39.
- 644 32 Godijk NG, Bootsma MCJ, van Werkhoven HC, *et al.* Does plasmid-based beta-lactam  
645 resistance increase *E. coli* infections: Modelling addition and replacement mechanisms. *PLoS*  
646 *Comput Biol* 2022; **18**: e1009875.
- 647 33 van den Bunt G, Fluit AC, Bootsma MCJ, *et al.* Dynamics of Intestinal Carriage of Extended-  
648 Spectrum Beta-lactamase-Producing Enterobacteriaceae in the Dutch General Population,  
649 2014-2016. *Clin Infect Dis* 2020; **71**: 1847–55.
- 650 34 Sundqvist M, Geli P, Andersson DI, *et al.* Little evidence for reversibility of trimethoprim  
651 resistance after a drastic reduction in trimethoprim use. *J Antimicrob Chemother* 2010; **65**:  
652 350–60.
- 653 35 Blanquart F, Lehtinen S, Lipsitch M, Fraser C. The evolution of antibiotic resistance in a  
654 structured host population. *J R Soc Interface* 2018; **15**. DOI:10.1098/rsif.2018.0040.
- 655 36 Austin DJ, Kakehashi M, Anderson RM. The transmission dynamics of antibiotic-resistant

- 656 bacteria: the relationship between resistance in commensal organisms and antibiotic  
657 consumption. *Proc Biol Sci* 1997; **264**: 1629–38.
- 658 37 Arcilla MS, van Hattem JM, Haverkate MR, *et al.* Import and spread of extended-spectrum  $\beta$ -  
659 lactamase-producing Enterobacteriaceae by international travellers (COMBAT study): a  
660 prospective, multicentre cohort study. *Lancet Infect Dis* 2017; **17**: 78–85.
- 661 38 Knight GM, Costelloe C, Deeny SR, *et al.* Quantifying where human acquisition of antibiotic  
662 resistance occurs: a mathematical modelling study. *BMC Med* 2018; **16**: 137.
- 663 39 Allel K, Goscé L, Araos R, *et al.* Transmission of gram-negative antibiotic-resistant bacteria  
664 following differing exposure to antibiotic-resistance reservoirs in a rural community: a  
665 modelling study for bloodstream infections. *Sci Rep* 2022; **12**: 13488.
- 666 40 Spicknall IH, Foxman B, Marrs CF, Eisenberg JNS. A modeling framework for the evolution  
667 and spread of antibiotic resistance: literature review and model categorization. *Am J*  
668 *Epidemiol* 2013; **178**: 508–20.
- 669 41 Johnson JR, Owens K, Gajewski A, Clabots C. Escherichia coli colonization patterns among  
670 human household members and pets, with attention to acute urinary tract infection. *J Infect*  
671 *Dis* 2008; **197**: 218–24.
- 672 42 Leimbach A, Hacker J, Dobrindt U. E. coli as an all-rounder: the thin line between  
673 commensalism and pathogenicity. *Curr Top Microbiol Immunol* 2013; **358**: 3–32.
- 674 43 Herindrainy P, Rabenandrasana MAN, Andrianirina ZZ, *et al.* Acquisition of extended  
675 spectrum beta-lactamase-producing enterobacteriaceae in neonates: A community based  
676 cohort in Madagascar. *PLoS One* 2018; **13**: e0193325.
- 677 44 Madigan T, Johnson JR, Clabots C, *et al.* Extensive Household Outbreak of Urinary Tract  
678 Infection and Intestinal Colonization due to Extended-Spectrum  $\beta$ -Lactamase-Producing  
679 Escherichia coli Sequence Type 131. *Clin Infect Dis* 2015; **61**: e5-12.
- 680 45 García-Rey C, Fenoll A, Aguilar L, Casal J. Effect of social and climatological factors on  
681 antimicrobial use and Streptococcus pneumoniae resistance in different provinces in Spain. *J*  
682 *Antimicrob Chemother* 2004; **54**: 465–71.
- 683 46 Otter JA, Natale A, Batra R, *et al.* Individual- and community-level risk factors for ESBL  
684 Enterobacteriaceae colonization identified by universal admission screening in London. *Clin*  
685 *Microbiol Infect* 2019; **25**: 1259–65.
- 686 47 Ling W, Peri AM, Furuya-Kanamori L, Harris PNA, Paterson DL. Carriage Duration and  
687 Household Transmission of Enterobacteriales Producing Extended-Spectrum Beta-Lactamase  
688 in the Community: A Systematic Review and Meta-Analysis. *Microb Drug Resist* 2022;  
689 published online June 21. DOI:10.1089/mdr.2022.0035.
- 690 48 Ruppé E, Armand-Lefèvre L, Estellat C, *et al.* High Rate of Acquisition but Short Duration of  
691 Carriage of Multidrug-Resistant Enterobacteriaceae After Travel to the Tropics. *Clin Infect*  
692 *Dis* 2015; **61**: 593–600.
- 693 49 van der Bij AK, Pitout JDD. The role of international travel in the worldwide spread of  
694 multiresistant Enterobacteriaceae. *J Antimicrob Chemother* 2012; **67**: 2090–100.
- 695 50 Krieger MS, Denison CE, Anderson TL, Nowak MA, Hill AL. Population structure across  
696 scales facilitates coexistence and spatial heterogeneity of antibiotic-resistant infections. *PLoS*  
697 *Comput Biol* 2020; **16**: e1008010.
- 698 51 Bogaert D, van Belkum A, Sluijter M, *et al.* Colonisation by Streptococcus pneumoniae and  
699 Staphylococcus aureus in healthy children. *Lancet* 2004; **363**: 1871–2.
- 700 52 Tenaillon O, Skurnik D, Picard B, Denamur E. The population genetics of commensal  
701 Escherichia coli. *Nat Rev Microbiol* 2010; **8**: 207–17.
- 702 53 Lipsitch M, Colijn C, Cohen T, Hanage WP, Fraser C. No coexistence for free: neutral null

- 703 models for multistrain pathogens. *Epidemics* 2009; **1**: 2–13.
- 704 54 Chang D, Sharma L, Dela Cruz CS, Zhang D. Clinical Epidemiology, Risk Factors, and  
705 Control Strategies of Klebsiella pneumoniae Infection. *Front Microbiol* 2021; **12**: 750662.
- 706 55 Duval A, Obadia T, Boëlle P-Y, *et al.* Close proximity interactions support transmission of  
707 ESBL-K. pneumoniae but not ESBL-E. coli in healthcare settings. *PLoS Comput Biol* 2019;  
708 **15**: e1006496.
- 709 56 Denkel LA, Maechler F, Schwab F, *et al.* Infections caused by extended-spectrum  $\beta$ -  
710 lactamase-producing Enterobacterales after rectal colonization with ESBL-producing  
711 Escherichia coli or Klebsiella pneumoniae. *Clin Microbiol Infect* 2020; **26**: 1046–51.
- 712 57 Maher MC, Alemayehu W, Lakew T, *et al.* The fitness cost of antibiotic resistance in  
713 Streptococcus pneumoniae: insight from the field. *PLoS One* 2012; **7**: e29407.
- 714 58 de Cellès MD, Pons-Salort M, Varon E, *et al.* Interaction of vaccination and reduction of  
715 antibiotic use drives unexpected increase of pneumococcal meningitis. *Sci Rep* 2015; **5**:  
716 11293.
- 717 59 Melnyk AH, Wong A, Kassen R. The fitness costs of antibiotic resistance mutations. *Evol*  
718 *Appl* 2015; **8**: 273–83.
- 719 60 Vanacker M, Lenuzza N, Rasigade J-P. The fitness cost of horizontally transferred and  
720 mutational antimicrobial resistance in Escherichia coli. *Front Microbiol* 2023; **14**: 1186920.
- 721 61 Enne VI, Delsol AA, Davis GR, Hayward SL, Roe JM, Bennett PM. Assessment of the fitness  
722 impacts on Escherichia coli of acquisition of antibiotic resistance genes encoded by different  
723 types of genetic element. *J Antimicrob Chemother* 2005; **56**: 544–51.
- 724 62 MacLean RC, San Millan A. The evolution of antibiotic resistance. *Science* 2019; **365**: 1082–  
725 3.
- 726 63 Lamberte LE, van Schaik W. Antibiotic resistance in the commensal human gut microbiota.  
727 *Curr Opin Microbiol* 2022; **68**: 102150.
- 728 64 Pamer EG. Resurrecting the intestinal microbiota to combat antibiotic-resistant pathogens.  
729 *Science* 2016; **352**: 535–8.
- 730 65 Chang Q, Lipsitch M, Hanage WP. Impact of Host Heterogeneity on the Efficacy of  
731 Interventions to Reduce Staphylococcus aureus Carriage. *Infect Control Hosp Epidemiol*  
732 2016; **37**: 197–204.
- 733 66 Leclerc QJ, Lindsay JA, Knight GM. Mathematical modelling to study the horizontal transfer  
734 of antimicrobial resistance genes in bacteria: current state of the field and recommendations. *J*  
735 *R Soc Interface* 2019; **16**: 20190260.
- 736 67 Mughini-Gras L, Kooh P, Augustin J-C, *et al.* Source attribution of foodborne diseases:  
737 potentialities, hurdles, and future expectations. *Front Microbiol* 2018; **9**: 1983.
- 738 68 Johnson AP. Surveillance of antibiotic resistance. *Philos Trans R Soc Lond B, Biol Sci* 2015;  
739 **370**: 20140080.
- 740 69 Assab R, Nekkab N, Crépey P, *et al.* Mathematical models of infection transmission in  
741 healthcare settings: recent advances from the use of network structured data. *Curr Opin Infect*  
742 *Dis* 2017; **30**: 410–8.
- 743
- 744
